# Supplementary material
Source: HighWire-hosted journal article supplement (https://www.annfammed.org/highwire/filestream/7974/field_highwire_adjunct_files/0/Do_Suppl_Apps.pdf)
Supplement: Do_Suppl_Apps.pdf [file Do_Suppl_Apps.pdf]

# ANNALS OF FAMILY MEDICINE

## Online Supplementary Material

Do BT, Hootman JM, Helmick CG, Brady TJ. Monitoring Healthy People 2010 arthritis management objectives: self-management education and clinician counseling for weight loss and exercise. *Ann Fam Med*. 2011;9(2):136-141.

<http://www.annfammed.org/cgi/content/full/9/2/136/DC1>

**Supplemental Table 1a. Estimated Age-Standardized,<sup>a</sup> Weighted Proportion of Adults Aged 18 Years and Older With Doctor-Diagnosed Arthritis Meeting HP2010 Arthritis Management Objectives, by Years of Data—Behavioral Risk Factor Surveillance Survey (BRFSS),<sup>b</sup> 17 States, 2003 and 2007**

| States<br>(Both Years) | Weight Counseling <sup>c</sup><br>Healthy People Objective 2-4a |                  | Physical Activity Counseling<br>Healthy People Objective 2-4b |                  | Arthritis Education<br>Healthy People Objective 2-8 |                  |
|------------------------|-----------------------------------------------------------------|------------------|---------------------------------------------------------------|------------------|-----------------------------------------------------|------------------|
|                        | 2003                                                            | 2007             | 2003                                                          | 2007             | 2003                                                | 2007             |
|                        | % (95% CI) <sup>d</sup>                                         | % (95% CI)       | % (95% CI)                                                    | % (95% CI)       | % (95% CI)                                          | % (95% CI)       |
| Arizona                | 32.7 (24.9-41.7)                                                | 48.9 (39.9-57.9) | 52.9 (46.1-59.5)                                              | 50.2 (43.1-57.3) | 15.5 (11.3-20.8)                                    | 12.8 (8.9-18.1)  |
| California             | 35.6 (30.1-41.4)                                                | 46.3 (40.1-52.6) | 54.4 (49.7-59.0)                                              | 55.9 (50.7-61.0) | 13.2 (10.5-16.3)                                    | 15.7 (12.3-19.7) |
| Connecticut            | 26.2 (22.0-30.9)                                                | 38.7 (33.5-44.2) | 44.4 (40.4-48.5)                                              | 57.9 (53.3-62.4) | 9.5 (7.4-12.1)                                      | 8.5 (6.5-10.9)   |
| Florida                | 35.4 (29.0-42.5)                                                | 42.5 (38.5-46.6) | 56.5 (50.7-62.2)                                              | 53.7 (50.3-57.1) | 15.7 (12.1-20.1)                                    | 15.4 (12.6-18.7) |
| Georgia                | 32.9 (28.2-37.8)                                                | 42.3 (37.9-46.9) | 49.0 (45.1-53.0)                                              | 53.9 (50.1-57.6) | 9.6 (7.2-12.6)                                      | 10.9 (8.8-13.6)  |
| Indiana                | 30.9 (27.3-34.7)                                                | 41.7 (36.7-47.0) | 48.2 (44.9-51.5)                                              | 53.8 (49.3-58.3) | 9.8 (7.9-12.1)                                      | 10.9 (8.0-14.8)  |
| Iowa                   | 27.1 (23.0-31.6)                                                | 38.3 (33.2-43.6) | 50.4 (46.1-54.6)                                              | 55.7 (50.8-60.4) | 11.5 (8.9-14.6)                                     | 10.5 (8.2-13.4)  |
| Kansas                 | 35.3 (30.3-40.7)                                                | 41.2 (35.7-47.0) | 49.3 (45.1-53.6)                                              | 48.5 (43.9-53.2) | 8.9 (7.0-11.4)                                      | 12.8 (9.6-16.8)  |
| Maryland               | 32.4 (27.9-37.3)                                                | 43.3 (36.6-50.2) | 46.4 (42.0-50.8)                                              | 56.3 (50.4-62.1) | 10.3 (7.9-13.3)                                     | 9.9 (7.1-13.7)   |
| Minnesota              | 25.9 (21.7-30.5)                                                | 37.1 (31.4-43.2) | 48.7 (44.0-53.4)                                              | 52.1 (46.7-57.4) | 12.5 (10.2-15.4)                                    | 16.8 (12.7-21.9) |
| Nebraska               | 29.5 (25.3-34.1)                                                | 42.9 (34.5-51.8) | 44.4 (40.5-48.5)                                              | 50.9 (43.0-58.8) | 11.5 (9.0-14.6)                                     | 10.6 (7.7-14.4)  |
| New York               | 33.1 (28.7-37.9)                                                | 48.8 (43.0-54.6) | 48.7 (44.7-52.6)                                              | 56.3 (51.6-60.9) | 9.7 (7.6-12.4)                                      | 9.9 (7.7-12.8)   |
| Ohio                   | 32.2 (26.6-38.3)                                                | 45.5 (40.5-50.6) | 49.4 (44.6-54.1)                                              | 56.2 (52.1-60.3) | 8.8 (6.6-11.7)                                      | 13.5 (10.8-16.8) |
| Pennsylvania           | 31.6 (27.1-36.5)                                                | 49.5 (44.9-54.1) | 54.7 (50.6-58.8)                                              | 56.6 (52.4-60.7) | 13.5 (10.9-16.7)                                    | 10.5 (8.6-12.7)  |
| Rhode Island           | 29.4 (24.5-34.7)                                                | 41.6 (35.6-47.9) | 54.4 (49.5-59.3)                                              | 60.0 (54.8-64.9) | 5.8 (4.4-7.7)                                       | 12.6 (9.4-16.6)  |
| South Carolina         | 30.5 (26.7-34.5)                                                | 41.0 (36.7-45.5) | 47.6 (44.1-51.0)                                              | 49.6 (46.1-53.2) | 10.5 (8.3-13.1)                                     | 10.0 (8.2-12.2)  |
| Virginia               | 29.3 (25.2-33.6)                                                | 42.9 (37.0-49.0) | 49.2 (44.9-53.5)                                              | 62.6 (57.1-67.9) | 12.8 (9.6-17.0)                                     | 9.8 (7.7-12.5)   |
| Median                 | 31.6                                                            | 42.5             | 49.2                                                          | 55.7             | 10.5                                                | 10.9             |
| Range                  | 25.9 - 35.6                                                     | 37.1 - 49.5      | 44.4 - 56.5                                                   | 48.5 - 62.6      | 5.8 - 15.7                                          | 8.5 - 16.8       |

<sup>a</sup> Age-standardized to the (standard) projected 2000 US population.<sup>1</sup>

<sup>b</sup> Although survey questions in the 2007 BRFSS survey were identical to those asked in the 2006 National Health Interview Survey, the latter survey is the official data source for monitoring progress towards the national arthritis management objectives. BRFSS data can be used to monitor progress toward meeting state-specific health objectives for 2010, but these data are not recommended for deriving national estimates.

<sup>c</sup> Includes only persons with a body mass index of  $\geq 25.0$  (calculated as weight in kilograms divided by height in meters squared).

<sup>d</sup> Confidence interval.

## Reference

1. Klein RJ, Schoenborn CZ. Age Adjustment using the 2000 Projected US Population. Statistical Notes No. 20. Hyattsville, MD: National Center for Health Statistics; 2001. <http://www.cdc.gov/nchs/data/statnt/statnt20.pdf>. Accessed March 8, 2010.

# ANNALS OF FAMILY MEDICINE

## Online Supplementary Material

Do BT, Hootman JM, Helmick CG, Brady TJ. Monitoring Healthy People 2010 arthritis management objectives: self-management education and clinician counseling for weight loss and exercise. *Ann Fam Med*. 2011;9(2):136-141.

<http://www.annfammed.org/cgi/content/full/9/2/136/DC1>

**Supplemental Table 1b. Estimated Age-Standardized,<sup>a</sup> Weighted Proportion of Adults Aged 18 Years and Older With Doctor-Diagnosed Arthritis Meeting HP2010 Arthritis Management Objectives, by Years of Data—Behavioral Risk Factor Surveillance Survey (BRFSS),<sup>b</sup> 16 States, 2003 or 2007**

| States<br>(1 Year) | Weight Counseling <sup>c</sup><br>Healthy People Objective 2-4a |                  | Physical Activity Counseling<br>Healthy People Objective 2-4b |                  | Arthritis Education<br>Healthy People Objective 2-8 |                  |
|--------------------|-----------------------------------------------------------------|------------------|---------------------------------------------------------------|------------------|-----------------------------------------------------|------------------|
|                    | 2003                                                            | 2007             | 2003                                                          | 2007             | 2003                                                | 2007             |
|                    | % (95% CI) <sup>d</sup>                                         | % (95% CI)       | % (95% CI)                                                    | % (95% CI)       | % (95% CI)                                          | % (95% CI)       |
| Alabama            | —                                                               | 39.2 (35.0-43.6) | —                                                             | 48.5 (44.6-52.4) | —                                                   | 11.3 (8.5-15.0)  |
| Alaska             | —                                                               | 40.4 (32.7-48.5) | —                                                             | 57.2 (50.8-63.9) | —                                                   | 14.6 (9.7-21.5)  |
| Arkansas           | 33.1 (28.6-37.9)                                                | —                | 42.6 (38.7-46.6)                                              | —                | 6.7 (5.1-8.8)                                       | —                |
| Idaho              | 26.8 (22.7-31.3)                                                | —                | 48.4 (44.2-52.7)                                              | —                | 13.3 (10.7-16.5)                                    | —                |
| Illinois           | —                                                               | 52.1 (46.2-57.9) | —                                                             | 58.7 (54.0-63.3) | —                                                   | 14.6 (11.1-18.9) |
| Kentucky           | —                                                               | 42.2 (36.9-47.7) | —                                                             | 52.9 (48.4-57.3) | —                                                   | 9.1 (6.4-12.8)   |
| Michigan           | —                                                               | 43.8 (37.2-50.6) | —                                                             | 54.6 (48.8-60.2) | —                                                   | 14.4 (10.4-19.6) |
| Missouri           | 29.0 (24.4-34.0)                                                | —                | 49.7 (44.8-54.6)                                              | —                | 13.7 (10.2-18.3)                                    | —                |
| Nevada             | 23.4 (18.3-29.4)                                                | —                | 45.0 (39.1-51.0)                                              | —                | 10.1 (6.9-14.5)                                     | —                |
| New Mexico         | —                                                               | 44.2 (38.6-50.0) | —                                                             | 55.1 (50.2-59.9) | —                                                   | 14.2 (11.0-18.0) |
| Oklahoma           | 30.1 (26.7-33.6)                                                | —                | 50.6 (47.4-53.8)                                              | —                | 10.3 (8.4-12.6)                                     | —                |
| Oregon             | —                                                               | 32.5 (25.8-40.0) | —                                                             | 53.2 (47.2-59.2) | —                                                   | 13.2 (9.9-17.4)  |
| Utah               | 24.4 (19.9-29.5)                                                | —                | 52.6 (47.5-57.6)                                              | —                | 15.6 (11.8-20.4)                                    | —                |
| Vermont            | 31.0 (25.9-36.5)                                                | —                | 57.9 (53.5-62.1)                                              | —                | 12.4 (9.6-17.0)                                     | —                |
| West Virginia      | —                                                               | 37.4 (32.8-42.2) | —                                                             | 43.6 (39.4-47.8) | —                                                   | 9.5 (7.3-12.3)   |
| Wisconsin          | —                                                               | 36.0 (29.8-42.7) | —                                                             | 52.7 (46.8-58.5) | —                                                   | 10.4 (7.6-14.1)  |

Note: States only answered arthritis management questions for only 1 year—either 2003 or 2007.

<sup>a</sup> Age-standardized to the (standard) projected 2000 US population.<sup>1</sup>

<sup>b</sup> Although survey questions in the 2007 BRFSS survey were identical to those asked in the 2006 National Health Interview Survey, the latter survey is the official data source for monitoring progress towards the national arthritis management objectives. BRFSS data can be used to monitor progress toward meeting state-specific health objectives for 2010, but these data are not recommended for deriving national estimates.

<sup>c</sup> Includes only persons with a body mass index of  $\geq 25.0$  (calculated as weight in kilograms divided by height in meters squared).

<sup>d</sup> Confidence interval.

## Reference

1. Klein RJ, Schoenborn CZ. Age Adjustment using the 2000 Projected US Population. Statistical Notes No. 20. Hyattsville, MD: National Center for Health Statistics; 2001. <http://www.cdc.gov/nchs/data/statnt/statnt20.pdf>. Accessed March 8, 2010.

Online Supplementary Material

Do BT, Hootman JM, Helmick CG, Brady TJ. Monitoring Healthy People 2010 arthritis management objectives: self-management education and clinician counseling for weight loss and exercise. *Ann Fam Med*. 2011;9(2):136-141.

<http://www.annfammed.org/cgi/content/full/9/2/136/DC1>

---

**Supplemental Appendix 1. List of Local Resources Health Care Professionals Can Reference When Counseling Patients With Arthritis**

**Local Resources**

Arthritis Foundation ([www.arthritis.org](http://www.arthritis.org)) – offers exercise and self-management education programs lead by certified instructors.

YMCA (<http://www.ymca.net/>) – offers exercise/aquatics and healthy living classes.

American College of Sports Medicine Profinder ([http://forms.acsm.org/\\_frm/crt/online\\_locator.asp](http://forms.acsm.org/_frm/crt/online_locator.asp)) – search engine to find local ACSM certified health and fitness professionals.

American Council on Exercise (<http://www.acefitness.org/findanacepro/default.aspx>) – search engine to find ACE-certified health and fitness instructors.
